# Supplementary material for: Nano-hydroxyapatite in oral care cosmetics: characterization and cytotoxicity assessment
Source: PubMed Central journal article supplement (PMC6667430; doi:10.1038/s41598-019-47491-z), 2019-07-30
Supplement: 41598_2019_47491_MOESM1_ESM.pdf [file 41598_2019_47491_MOESM1_ESM.pdf]

# **Nano-hydroxyapatite in oral care cosmetics: characterization and cytotoxicity assessment**

Catarina C. Coelho<sup>a,b,c,d,\*</sup>, Liliana Grenho<sup>e,f</sup>, Pedro S. Gomes<sup>e,f</sup>, Paulo A. Quadros<sup>d</sup>,  
Maria H. Fernandes<sup>e,f</sup>

*<sup>a</sup>Instituto de Investigação e Inovação em Saúde, U.Porto, Porto, Portugal*

*Address: Rua Alfredo Allen, 208, 4200-135 Porto, Portugal*

*<sup>b</sup>Instituto de Engenharia Biomédica, U.Porto, Porto, Portugal*

*Address: Rua Alfredo Allen, 208, 4200-135 Porto, Portugal*

*<sup>c</sup>Faculdade de Engenharia, U.Porto, Porto, Portugal*

*Address: Rua Dr. Roberto Frias, s/n, 4200-465 Porto, Portugal*

*<sup>d</sup>FLUIDINOVA, S.A., Maia, Portugal*

*Address: Rua Engenheiro Frederico Ulrich, 2650, 4470-605 Moreira da Maia,  
Portugal*

*<sup>e</sup>Laboratory for Bone Metabolism and Regeneration, Faculdade de Medicina Dentária,  
U.Porto, Porto, Portugal*

*Address: Rua Dr. Manuel Pereira da Silva, s/n, 4200-393 Porto, Portugal*

*<sup>f</sup>LAQV/REQUIMTE, U.Porto, Porto, 4160-007, Portugal*

*\*Corresponding author (catarina.coelho@i3s.up.pt)*

## Supplementary Information

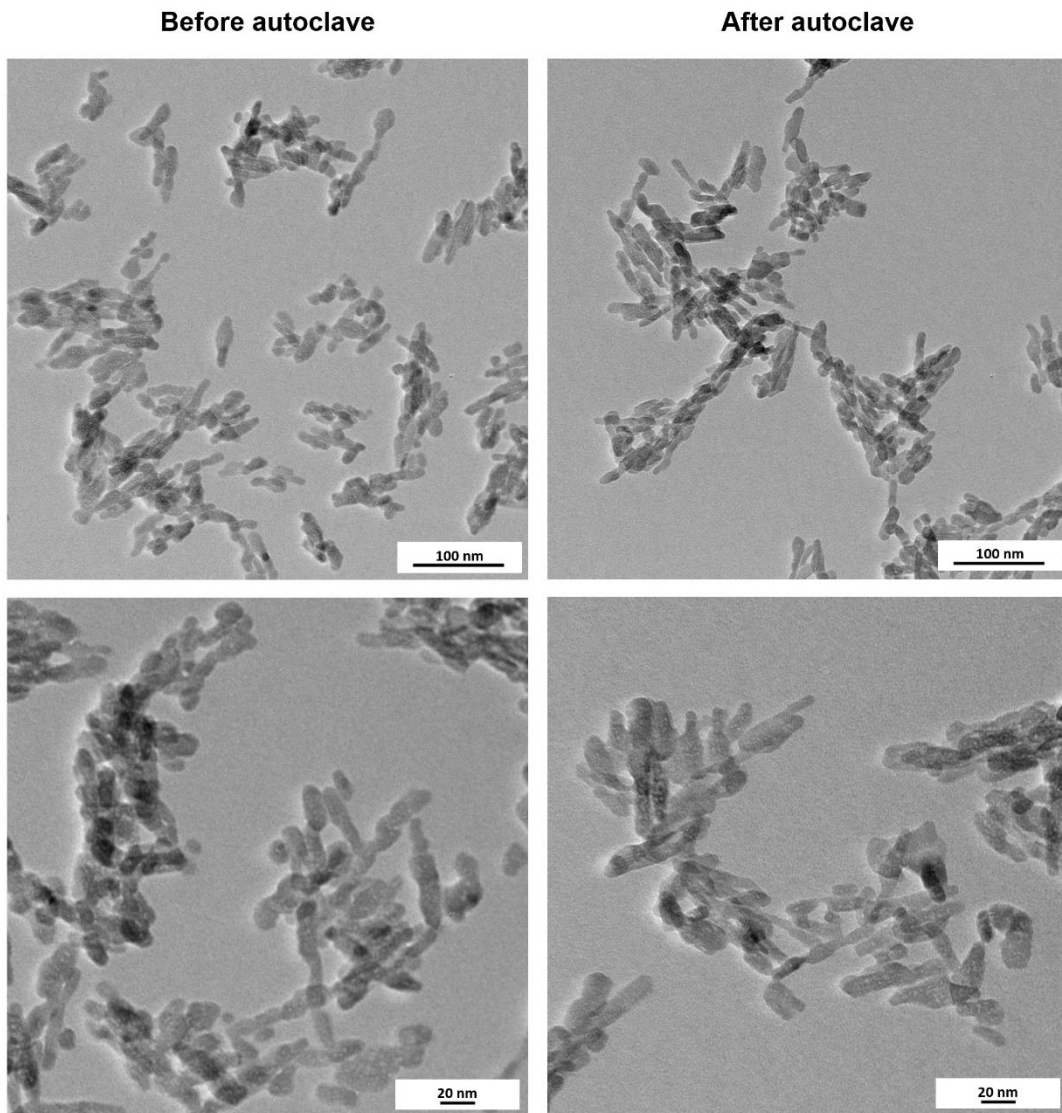

**Supplementary Figure 1:** TEM images of the hydroxyapatite nanoparticles before and after sterilization using autoclave.

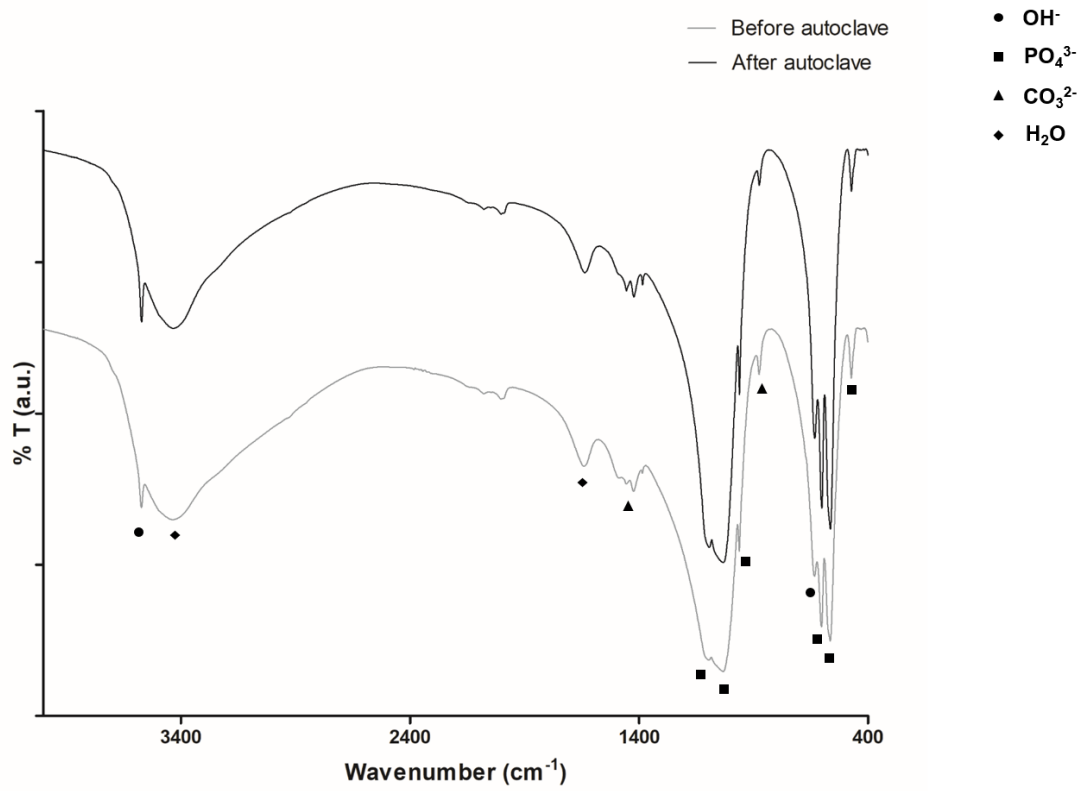

**Supplementary Figure 2:** FTIR spectra for hydroxyapatite nanoparticles before and after sterilization by autoclave.

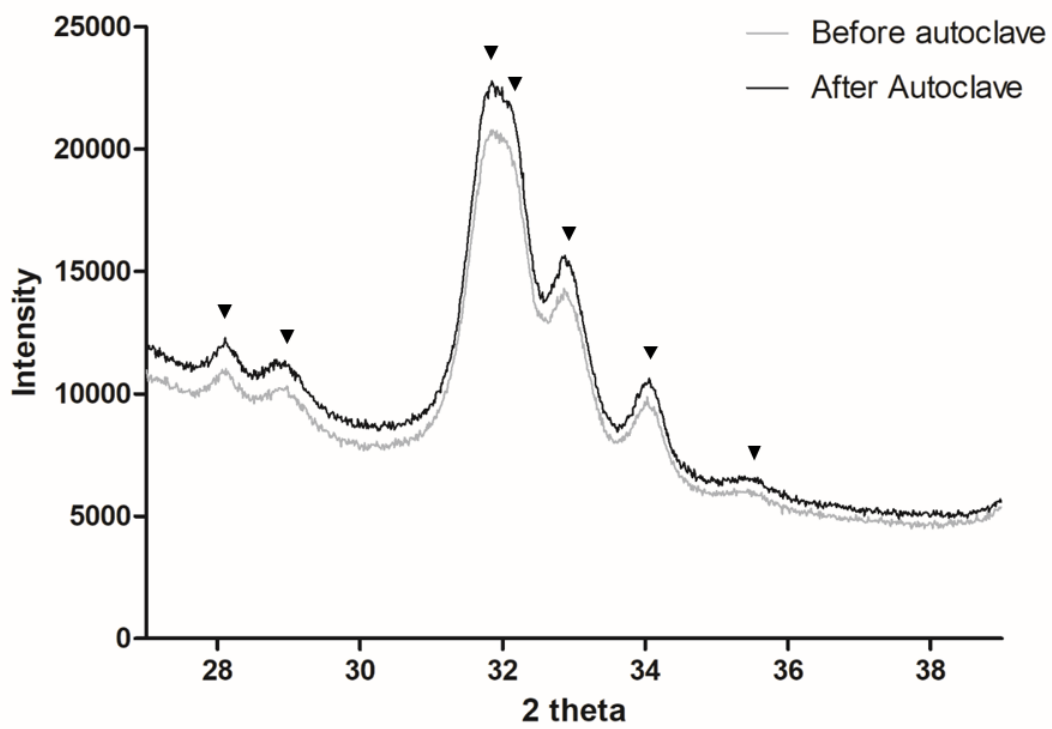

**Supplementary Figure 3:** XRD patterns obtained for hydroxyapatite nanoparticles before and after sterilization with autoclave.
